# Supplementary material
Source: PubMed Central journal article supplement (PMC6268129)
Supplement: NIHMS79814-supplement-Supplementary_Table_1.pdf [file NIHMS79814-supplement-Supplementary_Table_1.pdf]

| Subject                                                                                                                                                                                                                                                                                                                                                                                                                                                                                                                                       | #1  | #2  | #3  |
|-----------------------------------------------------------------------------------------------------------------------------------------------------------------------------------------------------------------------------------------------------------------------------------------------------------------------------------------------------------------------------------------------------------------------------------------------------------------------------------------------------------------------------------------------|-----|-----|-----|
| Gender                                                                                                                                                                                                                                                                                                                                                                                                                                                                                                                                        | m   | m   | m   |
| Age (y)                                                                                                                                                                                                                                                                                                                                                                                                                                                                                                                                       | 28  | 35  | 47  |
| Years after SCI                                                                                                                                                                                                                                                                                                                                                                                                                                                                                                                               | 6   | 6   | 4   |
| WISCI II score                                                                                                                                                                                                                                                                                                                                                                                                                                                                                                                                | 13  | 6   | 0   |
| AIS                                                                                                                                                                                                                                                                                                                                                                                                                                                                                                                                           | C   | D   | C*  |
| Neurological level of injury                                                                                                                                                                                                                                                                                                                                                                                                                                                                                                                  | C7  | C4  | C7  |
| UEMS total (max 50)                                                                                                                                                                                                                                                                                                                                                                                                                                                                                                                           | 46  | 31  | 45  |
| LER motor subscore (max 25)                                                                                                                                                                                                                                                                                                                                                                                                                                                                                                                   | 14  | 13  | 0   |
| LEL motor subscore (max 25)                                                                                                                                                                                                                                                                                                                                                                                                                                                                                                                   | 0   | 12  | 0   |
| LE motor score L2 (R/L)                                                                                                                                                                                                                                                                                                                                                                                                                                                                                                                       | 2/0 | 2/2 | 0/0 |
| LE motor score L3 (R/L)                                                                                                                                                                                                                                                                                                                                                                                                                                                                                                                       | 2/0 | 4/4 | 0/0 |
| LE motor score L4 (R/L)                                                                                                                                                                                                                                                                                                                                                                                                                                                                                                                       | 4/0 | 2/1 | 0/0 |
| LE motor score L5 (R/L)                                                                                                                                                                                                                                                                                                                                                                                                                                                                                                                       | 4/0 | 1/1 | 0/0 |
| LE motor score S1 (R/L)                                                                                                                                                                                                                                                                                                                                                                                                                                                                                                                       | 2/0 | 4/4 | 0/0 |
| LTR sensory subscore                                                                                                                                                                                                                                                                                                                                                                                                                                                                                                                          | 38  | 29  | 26  |
| LTL sensory subscore                                                                                                                                                                                                                                                                                                                                                                                                                                                                                                                          | 37  | 36  | 29  |
| LE sensory score L1 (R/L)                                                                                                                                                                                                                                                                                                                                                                                                                                                                                                                     | 1/1 | 1/1 | 0/0 |
| LE sensory score L2 (R/L)                                                                                                                                                                                                                                                                                                                                                                                                                                                                                                                     | 1/1 | 1/1 | 0/0 |
| LE sensory score L3 (R/L)                                                                                                                                                                                                                                                                                                                                                                                                                                                                                                                     | 1/1 | 1/1 | 0/1 |
| LE sensory score L4 (R/L)                                                                                                                                                                                                                                                                                                                                                                                                                                                                                                                     | 1/1 | 1/2 | 0/0 |
| LE sensory score L5 (R/L)                                                                                                                                                                                                                                                                                                                                                                                                                                                                                                                     | 1/1 | 1/1 | 0/1 |
| LE sensory score S1 (R/L)                                                                                                                                                                                                                                                                                                                                                                                                                                                                                                                     | 1/1 | 0/1 | 1/1 |
| LE sensory score S2 (R/L)                                                                                                                                                                                                                                                                                                                                                                                                                                                                                                                     | 1/1 | 0/1 | 0/1 |
| PPR sensory subscore                                                                                                                                                                                                                                                                                                                                                                                                                                                                                                                          | 17  | 29  | 13  |
| PPL sensory subscore                                                                                                                                                                                                                                                                                                                                                                                                                                                                                                                          | 16  | 36  | 15  |
| PPR, dermatome L1-S2                                                                                                                                                                                                                                                                                                                                                                                                                                                                                                                          | 0   | 4   | 0   |
| PPL, dermatome L1-S2                                                                                                                                                                                                                                                                                                                                                                                                                                                                                                                          | 0   | 8   | 0   |
| <p>AIS, American Spinal Injury Association Impairment Scale; LEMS, Lower extremity motor score; SCI, spinal cord injury; LEL, Lower extremity left; LER, lower extremity right; LTL, Light touch left; LTR, Light touch right; PPL, Pin prick left; PPR, Pin prick right; R/L, right/left; UEMS, Upper extremity motor score; WISCI, Walking index for spinal cord injury.</p> <p>*Reason of AIS C classification in spite of motor scores of 0 throughout all lower extremity key muscles is the presence of voluntary anal contraction.</p> |     |     |     |

**Supplementary Table 1 | Subjects' data and neurological status according to the International Standards for Neurological Classification of Spinal Cord Injury.** All the values were collected before the surgical
